# Supplementary material
Source: PubMed Central journal article supplement (PMC3423645)
Supplement: Supp_Fig1.pdf [file Supp_Fig1.pdf]

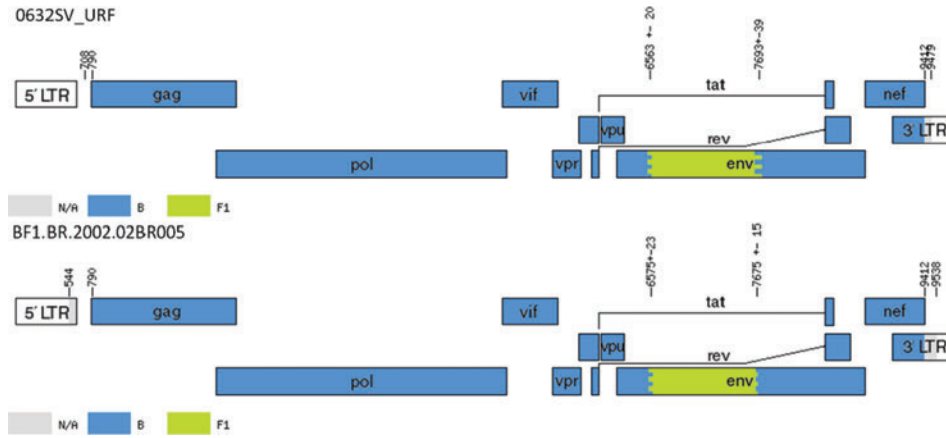

**SUPPLEMENTARY FIG. S1.** Comparison between the recombination profiles of isolate 0632SV\_URF and a previously published sequence from a nearby location (BF1.BR.2002.02BR005, accession number: DQ358806). These sequences have identical breakpoints in the *env* region and may represent a new CRF\_BF circulating in São Paulo State.
