# Supplementary material
Source: PubMed Central journal article supplement (PMC3423645)
Supplement: Supp_Fig2.pdf [file Supp_Fig2.pdf]

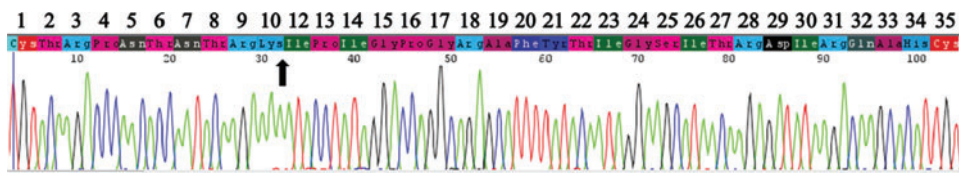

**SUPPLEMENTARY FIG. S2.** Electropherogram of a sequencing reaction from the V3 region of isolate 0008SP. The black arrow shows the observed deletion at position 11.
