# Supplementary material
Source: PubMed Central journal article supplement (PMC3423645)
Supplement: Supp_Table.pdf [file Supp_Table.pdf]

SUPPLEMENTARY TABLE S1. BREAKPOINTS LOCATION  
IN RELATION TO HXB2, ESTIMATED USING jpHMM

| <i>Isolate</i> | <i>Fragment<br/>start<br/>position</i> | <i>Breakpoint<br/>interval<br/>start–end</i> | <i>Fragment<br/>end<br/>position</i> | <i>Fragment<br/>subtype</i> |
|----------------|----------------------------------------|----------------------------------------------|--------------------------------------|-----------------------------|
| <b>0008SP</b>  | 638                                    | —                                            | 789                                  | N/A                         |
|                | 790                                    | 1324–1392                                    | 1350                                 | B                           |
|                | 1351                                   | 1701–1724                                    | 1717                                 | F1                          |
|                | 1718                                   | 2064–2099                                    | 2066                                 | B                           |
|                | 2067                                   | 2317–2415                                    | 2375                                 | F1                          |
|                | 2376                                   | 3723–3812                                    | 3811                                 | B                           |
|                | 3812                                   | 5148–5178                                    | 5162                                 | F1                          |
|                | 5163                                   | 5282–5310                                    | 5309                                 | B                           |
|                | 5310                                   | 5508–5839                                    | 5816                                 | F1                          |
|                | 5817                                   | 8663–8680                                    | 8668                                 | B                           |
|                | 8669                                   | 8962–9021                                    | 8983                                 | F1                          |
|                | 8984                                   | —                                            | 9408                                 | B                           |
|                | 9408                                   | —                                            | 9536                                 | N/A                         |
| <b>0063SV</b>  | 760                                    | —                                            | 789                                  | N/A                         |
|                | 790                                    | 1220–1378                                    | 1227                                 | B                           |
|                | 1228                                   | 2488–2551                                    | 2541                                 | F1                          |
|                | 2542                                   | 3707–3780                                    | 3712                                 | B                           |
|                | 3713                                   | 5791–5828                                    | 5824                                 | F1                          |
|                | 5825                                   | —                                            | 9411                                 | B                           |
|                | 9412                                   | —                                            | 9576                                 | N/A                         |
| <b>0264SV</b>  | 720                                    | —                                            | 789                                  | N/A                         |
|                | 790                                    | 1238–1324                                    | 1322                                 | B                           |
|                | 1323                                   | 2501–2551                                    | 2541                                 | F1                          |
|                | 2542                                   | 3680–3730                                    | 3691                                 | B                           |
|                | 3692                                   | 5802–5842                                    | 5824                                 | F1                          |
|                | 5825                                   | —                                            | 9411                                 | B                           |
| 9412           | —                                      | 9574                                         | N/A                                  |                             |
| <b>0614SV</b>  | 782                                    | —                                            | 789                                  | N/A                         |
|                | 790                                    | 1210–1259                                    | 1226                                 | B                           |
|                | 1227                                   | 2518–2551                                    | 2534                                 | F1                          |
|                | 2535                                   | —                                            | 9411                                 | B                           |
| 9412           | —                                      | 9579                                         | N/A                                  |                             |
| <b>0632SV</b>  | 708                                    | —                                            | 789                                  | N/A                         |
|                | 790                                    | 6543–6583                                    | 6583                                 | B                           |
|                | 6584                                   | 7654–7731                                    | 7658                                 | F1                          |
|                | 7659                                   | —                                            | 9411                                 | B                           |
| 9412           | —                                      | 9479                                         | N/A                                  |                             |
| <b>0647SV</b>  | 758                                    | —                                            | 789                                  | N/A                         |
|                | 790                                    | 1210–1333                                    | 1220                                 | B                           |
|                | 1221                                   | 2466–2549                                    | 2517                                 | F1                          |
|                | 2518                                   | 3681–3745                                    | 3705                                 | B                           |
|                | 3706                                   | 5767–5863                                    | 5789                                 | F1                          |
|                | 5790                                   | —                                            | 9411                                 | B                           |
| 9412           | —                                      | 9562                                         | N/A                                  |                             |
| <b>0679SV</b>  | 631                                    | —                                            | 789                                  | N/A                         |
|                | 790                                    | 1231–1392                                    | 1350                                 | B                           |
|                | 1351                                   | 2486–2547                                    | 2517                                 | F1                          |
|                | 2518                                   | —                                            | 9411                                 | B                           |
|                | 9412                                   | —                                            | 9570                                 | N/A                         |
| <b>0736SV</b>  | 782                                    | —                                            | 789                                  | N/A                         |
|                | 790                                    | 1222–1378                                    | 1227                                 | B                           |
|                | 1228                                   | 2283–2351                                    | 2307                                 | F1                          |
|                | 2308                                   | —                                            | 9407                                 | B                           |
|                | 9407                                   | —                                            | 9589                                 | N/A                         |
| <b>0744SV</b>  | 859                                    | 1227–1259                                    | 1259                                 | B                           |
|                | 1260                                   | 2500–2551                                    | 2541                                 | F1                          |
|                | 2542                                   | —                                            | 9411                                 | B                           |
|                | 9412                                   | —                                            | 9529                                 | N/A                         |

jpHMM, jumping profile hidden Markov model.
